# Supplementary material for: Interaction of Sp1 and Setd8 promotes vascular smooth muscle cells apoptosis by activating Mark4 in vascular calcification
Source: publisher site journal article supplement (doi:10.18632/aging.205492), 2024-02-01
Supplement: Supplementary file [file aging-v16i3-205492-supplementary-material-SD1.pdf]

## SUPPLEMENTARY TABLES

**Supplementary Table 1. The sequences of primers used for RT-qPCR.**

| Gene         | Forward primer                               | Reverse primer                              |
|--------------|----------------------------------------------|---------------------------------------------|
| <b>Human</b> |                                              |                                             |
| Mark1        | GAGCGGGACACGGAAAATCAT                        | TGCTACTCGACTTGGTAGGCT                       |
| Mark2        | CACATTGGAACTACCGGCTC                         | GGAGGAGTTCAGTTGAGTCTTGT                     |
| Mark3        | GGAGGAGTTCAGTTGAGTCTTGT                      | GCCTGTAAGGATATGTCTTGCC                      |
| Mark4        | AGGTTGCCATCAAGATTATCGAC                      | GATGCGGACTTCTCGGAACAG                       |
| Sp1          | AGTTCCAGACCGTTGATGGG                         | GTTTGCACCTGGTATGATCTGT                      |
| Setd8        | TCCAGCAATCCTCCTCCTCCTC                       | CCAGCCTAAGCAACAGATCCAGA                     |
| <b>Rat</b>   |                                              |                                             |
| Mark4 Setd8  | TGATGACCCGAAGAAACACCT<br>AAAGACGCCAGGAAAGTCC | GCTGTGACTGGAGGGTGAG<br>TTCCACCACAAAGTCACCCC |

**Supplementary Table 2. The antibodies used in this study.**

|                            |                        |            |                                                               |
|----------------------------|------------------------|------------|---------------------------------------------------------------|
| Anti-Mark4                 | CST                    | #4834      | WB 1:500; IHC/IF: 1:50                                        |
| Anti-Caspase-3             | CST                    | #9662      | WB 1:1000; IHC: 1:200                                         |
| Anti-phosphor-Akt (Ser473) | CST                    | #4060      | WB 1:1000                                                     |
| Anti-Akt                   | CST                    | #9272      | WB 1:1000                                                     |
| Anti-Sp1                   | Proteintech            | #2196-1-AP | WB 1:1000; IHC/IF 1:200; IP: 5 µl for 1mg protein; Chip :4 ug |
| Anti-BAX                   | Abcam                  | #ab32503   | WB 1:2000                                                     |
| Anti-Bcl2                  | Abcam                  | #ab196495  | WB 1:1000                                                     |
| Anti-Runx2                 | Abcam                  | #ab76956   | WB 1:500; IHC/IF 1:200;                                       |
| Anti-Setd8                 | Santa                  | #sc377034  | WB 1:500; IHC/IF 1:100; IP: 5 µl for 1mg protein              |
| GAPDH                      | Bioworld Technology Co | #AP0063    | WB 1:1000                                                     |
| Anti-rabbit                | Report                 | #S1002     | WB: 1:5000                                                    |
| Anti-mouse                 | Seracare               | #S1001     | WB: 1:1000                                                    |
| Anti-rabbit-DyLight488     | Abbkine                | #A23220    | IF: 1:200                                                     |
| Anti-mouse-DyLight 594     | Abbkine                | #A23410    | IF: 1:200                                                     |
| Rabbit control IgG         | ABclonal               | #AC005     | IP: 3 µl, Chip:1 µl                                           |

**Supplementary Table 3. The sequences of primers used for ChIP.**

| Gene    | Forward primer       | Reverse primer       |
|---------|----------------------|----------------------|
| Mark4-1 | CTGGGATTTGAACTGAGGAC | CAAGCTGGTTATAGGACTGG |
| Mark4-2 | CTTTCCTCCCACAAGGCACT | TAGCTGGAAGCCCAAACAGG |
| Mark4-3 | TTCTTCCCACCTCGCGTCTG | CCGGCTCTTAAAGGCACAGG |
